# Supplementary material for: Transcriptional profiling of GBM invasion genes identifies effective inhibitors of the LIM kinase-Cofilin pathway
Source: PubMed Central journal article supplement (PMC4253441; doi:10.18632/oncotarget.2412), 2014-09-05
Supplement: oncotarget-05-9382-s001.pdf [file oncotarget-05-9382-s001.pdf]

## SUPPLEMENTARY FIGURE

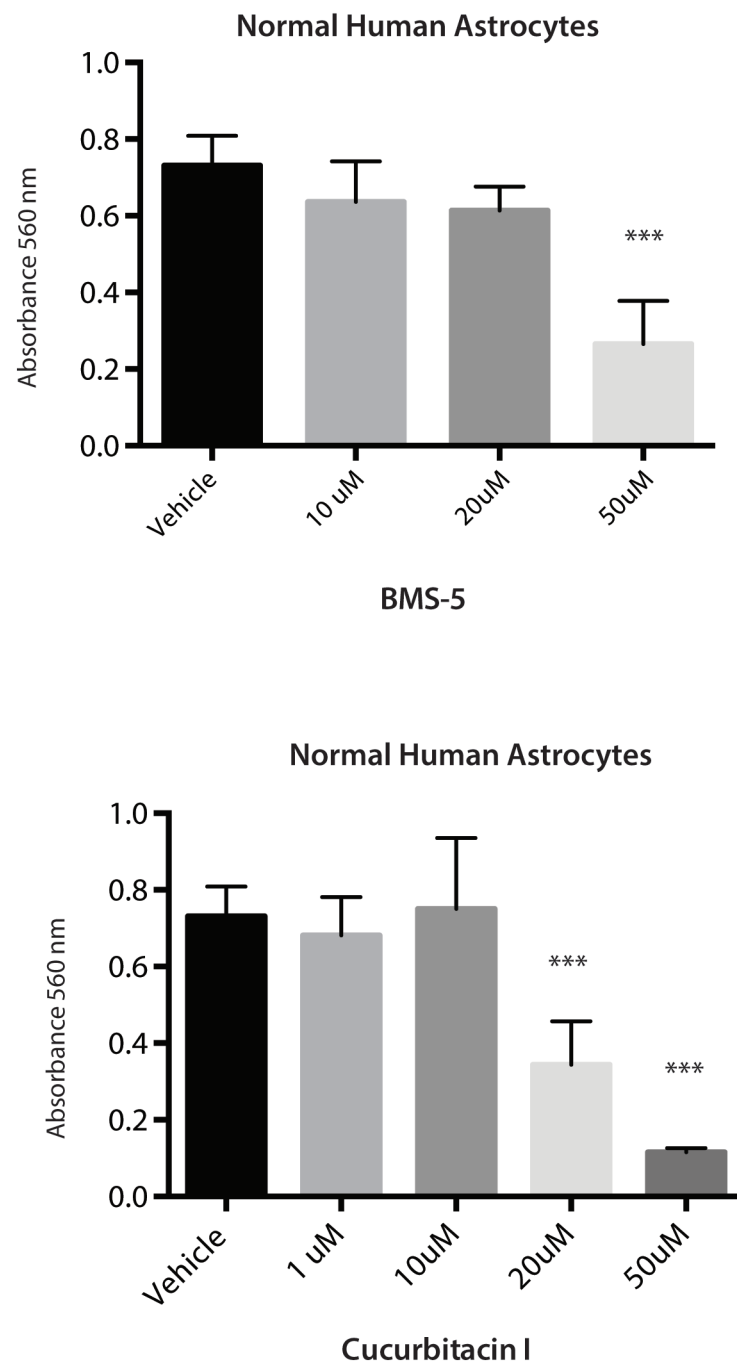

**Supplementary Figure S1:** (A) Cell Viability assay on normal human astrocytes using varying concentrations of BMS-5 measured on day 5. (B) Cell Viability assay on normal human astrocytes using varying concentrations of Cucurbitacin I measured on day 5. \*\*\* $p < 0.0001$ .
